# Supplementary material for: Interpreting angina: symptoms along a gender continuum
Source: PubMed Central journal article supplement — Open Heart. 2016 Apr 28;3(1):e000376. doi: 10.1136/openhrt-2015-000376 (PMC4854148; doi:10.1136/openhrt-2015-000376), 2016-04-28
Supplement: openhrt-2015-000376supp.pdf [file openhrt-2015-000376supp.pdf]

## Appendix A: Semi-Structured Interview Guide

### Description of chest-related pain/discomfort/feelings/sensations/symptoms/experiences

1. Can you describe to me what brings you here today? Why did your physician think it was important for you to have this test (cardiac catheterization)?
2. Can you describe to me what you have been feeling/experiencing in the events leading up to this test?
3. Would you describe this feeling(s)/sensation(s) as symptoms? If not, what would you prefer calling them\*?
4. How did you feel when you were experiencing these *symptoms*\*?
5. Did you notice any other unusual feelings/sensations/experiences/symptoms \*?
6. How long did this experience last for when you experienced it?
7. Did this/these sensation(s) /experience(s) improve? Did you notice if anything makes them feel better? Worse?
8. When did you first notice/ feel these symptoms\*?
  - a. What were you doing?
  - b. Where were you?
  - c. What did you first think was causing your symptoms\* at that time?
9. If you felt your symptoms\* more than once, did you notice a pattern?
  - a. For example, when would they occur?
10. How long did you experience your symptoms\* before you sought medical attention?
  - a. Why not sooner?

*\*substitute whatever word the patient prefers using for symptom*
